# Supplementary material
Source: PubMed Central journal article supplement (PMC1817639)
Supplement: 7601594s6.pdf [file 7601594s6.pdf]

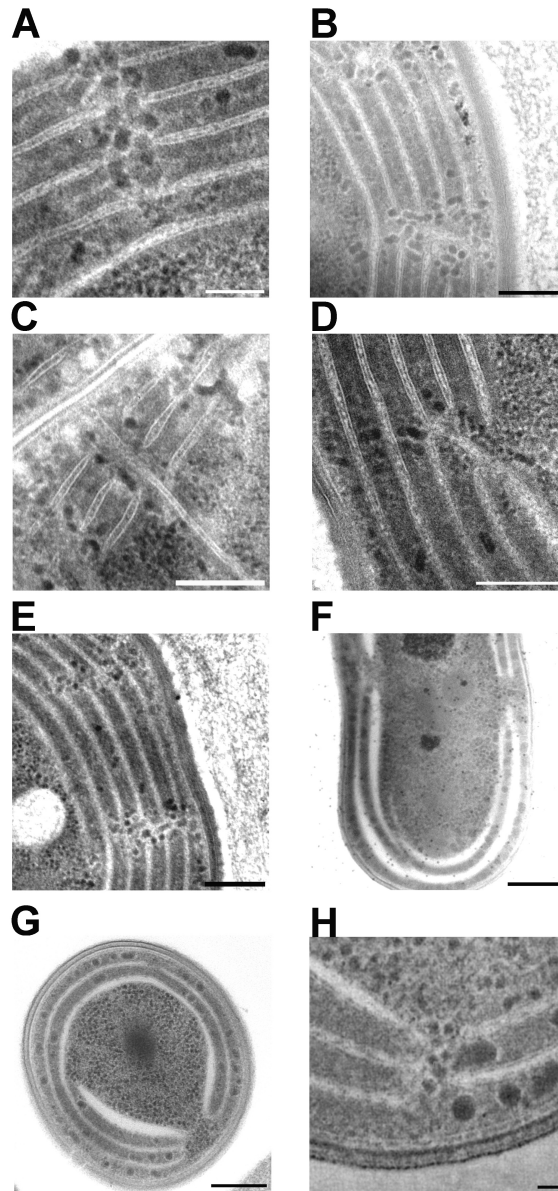

**Figure S1.** Perforations in the thylakoid membranes of *Microcoleus* sp. (A-E) and *Synechococcus* sp. PCC 7942 (F-H) cells. Scale bars, 100 nm (A); 200 nm (B); 200 nm (C); 200 nm (D); 250 nm (E); 200 nm (F); 100 nm (G); 30 nm (H).
