# Supplementary material
Source: PubMed Central journal article supplement (PMC1817639)
Supplement: 7601594s7.pdf [file 7601594s7.pdf]

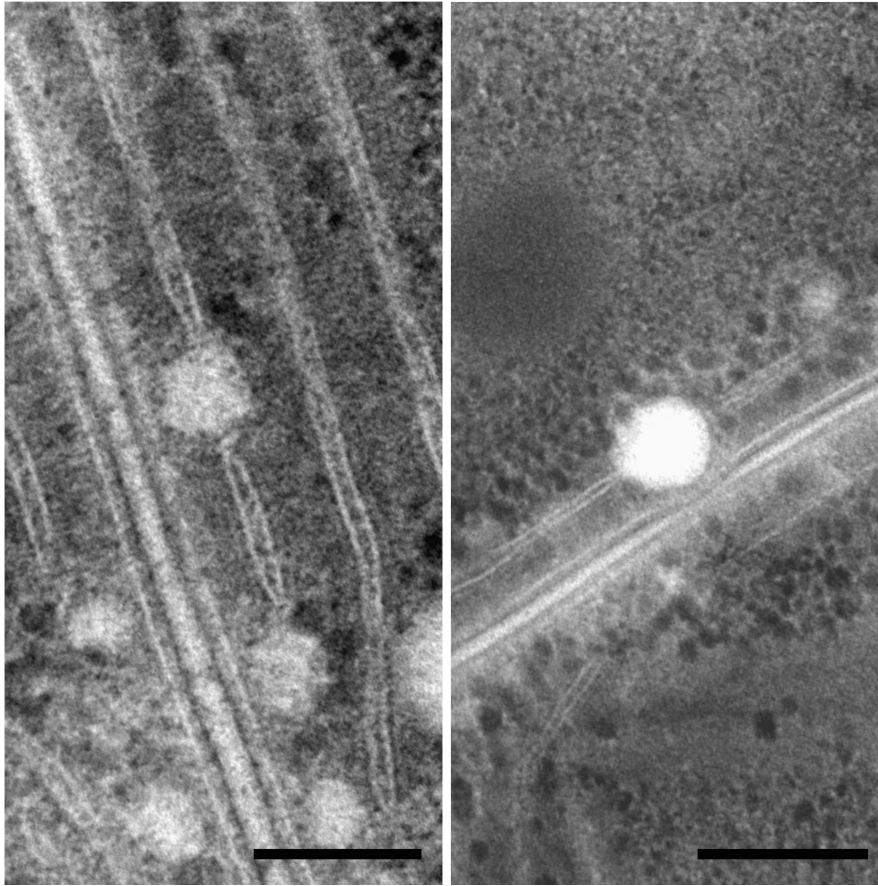

**Figure S2.** Lipid bodies observed inside membrane perforations of *Microcoleus* sp. thylakoids. Scale bar, 200 nm.
