# Supplementary material
Source: PubMed Central journal article supplement (PMC1817639)
Supplement: 7601594s8.pdf [file 7601594s8.pdf]

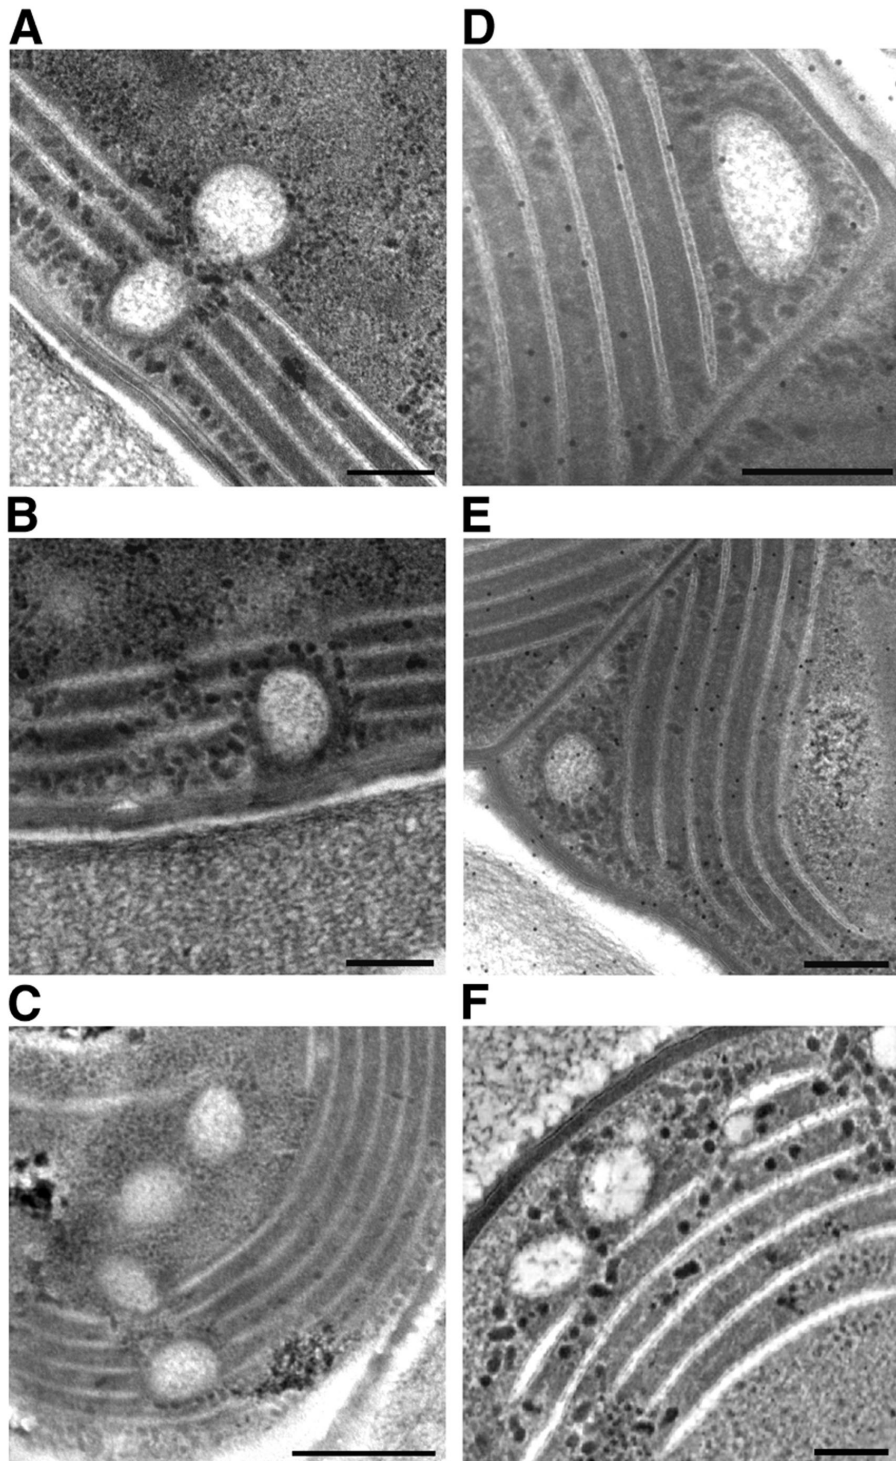

**Figure S3.** Membrane delimited vesicles inside *Microcoleus* sp. cells. Scale bars, 200 nm (A); 200 nm (B); 500 nm (C); 200 nm (D); 200 nm (E); 140 nm (F).
